# Supplementary material for: The physio-affective symptoms of Long COVID are strongly predicted by the severity of the acute infectious phase, and lowered antioxidants, nitric oxide, and alanine transaminase levels
Source: medRxiv preprint, doi:10.1101/2025.02.07.25321870, version 1 (2025-02-08)
Supplement: supplementary file [file 321870_file02.docx]

**ELECTRONIC SUPPLEMENTARY FILE (ESF)**

**The neuro-psycho-somatic symptoms of Long COVID are strongly predicted by the severity of the acute infectious phase, and lowered antioxidant, nitric oxide, and alanine transaminase levels.**

Michael Maes, Chavit Tunvirachaisakul, Laura de Oliveira Semeão, Ana Paula Michelin, Andressa K. Matsumoto, Francis F. Brinholi, Decio S. Barbosa, Yingqian Zhang, Pimpayao Sodsai, Nattiya Hirankarn, Abbas F. Almulla.

ESF, Table 1. Long COVID symptoms assessed in the present study.

| Depressive symptoms | Depressed mood |
| --- | --- |
| Loss of interest |
| Anxiety |
| Loss of appetite |
| Weight loss |
| Forgetfullness |
| Concentration disorders |
| Impaired decision making |
| Insomnia |
| Slowness movements |
| CFS/ME symptoms | Fatigue |
| Post-exertional malaise |
| Headache |
| Muscle pain |
| Muscle stiffness |
| Respiratory symptoms | Pain on breathing |
| Dry cough |
| Shortness of breath |
| Chest pain |
| Neurological symptoms | Tremor |
| Numbness |
| Swallowing problems |
| Weakness in the limbs |
| Dizziness |
| Balance problems |
| Unsteady gait |
| Impairments of voluntary motor movements |
| Myoclonic jerks |
| Fainting |
| Seizures |
| Smell loss |
| Loss of taste |
| Hearing problem |
| Gastro-intestinal symptoms | Constipation |
| Diarrhea |
| Nausea |
| Stomach pain |
